# Supplementary material for: HIV Treatment with the Two-Drug Regimen Dolutegravir Plus Lamivudine in Real-world Clinical Practice: A Systematic Literature Review
Source: PubMed Central journal article supplement — Infect Dis Ther. 2021 Aug 24;10(4):2051–70. doi: 10.1007/s40121-021-00522-7 (PMC8572911; doi:10.1007/s40121-021-00522-7), 2021-08-24

## SUPPLEMENTARY MATERIAL

| <b>Table S1. Search Strategy</b>                    |                                                                                                                                                                                                                                                                                                                                                                                                                                                                                                                                                                                                                                                                                                                                                                                                                                                                                                                                                                                                                                                                          |              |                |
|-----------------------------------------------------|--------------------------------------------------------------------------------------------------------------------------------------------------------------------------------------------------------------------------------------------------------------------------------------------------------------------------------------------------------------------------------------------------------------------------------------------------------------------------------------------------------------------------------------------------------------------------------------------------------------------------------------------------------------------------------------------------------------------------------------------------------------------------------------------------------------------------------------------------------------------------------------------------------------------------------------------------------------------------------------------------------------------------------------------------------------------------|--------------|----------------|
| <b>No.</b>                                          | <b>Query</b>                                                                                                                                                                                                                                                                                                                                                                                                                                                                                                                                                                                                                                                                                                                                                                                                                                                                                                                                                                                                                                                             | <b>Facet</b> | <b>Results</b> |
| <b>Embase® and MEDLINE® database search strings</b> |                                                                                                                                                                                                                                                                                                                                                                                                                                                                                                                                                                                                                                                                                                                                                                                                                                                                                                                                                                                                                                                                          |              |                |
| 1                                                   | 'human immunodeficiency virus infection'/exp OR 'human immunodeficiency virus infection'                                                                                                                                                                                                                                                                                                                                                                                                                                                                                                                                                                                                                                                                                                                                                                                                                                                                                                                                                                                 | Disease      | 389,563        |
| 2                                                   | 'human immunodeficiency virus'/exp OR 'human immunodeficiency virus' OR 'human immunodeficiency virus' OR (human NEXT/5 (immun* OR immunodeficiency OR immunodeficiency OR virus OR infection*)) OR ('human immun*' AND 'deficiency virus')                                                                                                                                                                                                                                                                                                                                                                                                                                                                                                                                                                                                                                                                                                                                                                                                                              |              | 623,067        |
| 3                                                   | 'hiv':ab,ti OR 'hiv-1':ab,ti OR 'hiv 1':ab,ti OR 'hiv-2':ab,ti OR 'hiv 2':ab,ti OR 'hiv1':ab,ti OR 'hiv2':ab,ti OR 'hiv-i':ab,ti OR 'hiv-ii':ab,ti OR 'hiv infection' OR 'hiv-infection' OR 'hiv infect*' OR ('hiv':ab,ti AND infect*)                                                                                                                                                                                                                                                                                                                                                                                                                                                                                                                                                                                                                                                                                                                                                                                                                                   |              | 408,665        |
| 4                                                   | 'acquired immune deficiency syndrome'/exp                                                                                                                                                                                                                                                                                                                                                                                                                                                                                                                                                                                                                                                                                                                                                                                                                                                                                                                                                                                                                                |              | 141,651        |
| 5                                                   | 'aids':ab,ti OR ('acquired immun*' AND 'deficiency virus') OR (acquir* NEXT/5 (immun* OR immunodeficiency OR immunodeficiency OR virus OR infection*))                                                                                                                                                                                                                                                                                                                                                                                                                                                                                                                                                                                                                                                                                                                                                                                                                                                                                                                   |              | 280,642        |
| 6                                                   | #1 OR #2 OR #3 OR #4 OR #5                                                                                                                                                                                                                                                                                                                                                                                                                                                                                                                                                                                                                                                                                                                                                                                                                                                                                                                                                                                                                                               |              | 806,834        |
| 7                                                   | 'cohort analysis'/exp OR 'longitudinal study'/exp OR 'prospective study'/exp OR 'follow up'/exp OR 'major clinical study'/exp OR 'clinical article'/exp OR 'intervention study'/exp OR cohort*:ab,ti OR (((('follow up' OR followup) NEXT/1 (study OR studies)):ab,ti) OR 'retrospective study'/exp OR 'case control study'/exp OR ((case* NEXT/1 control*):ab,ti) OR 'register'/de OR regist*:ab,ti OR 'data base'/de OR database:ab,ti OR 'data base':ab,ti OR (('real world' NEXT/1 (evidence OR data OR study OR studies)):ab,ti) OR 'health care record':ab,ti OR 'healthcare record':ab,ti OR 'health care records':ab,ti OR 'healthcare records':ab,ti OR 'medical record':ab,ti OR 'medical records':ab,ti OR questionnaire OR survey* OR ((medical OR insurance) AND (claims OR claim OR 'claims database' OR 'claim database')) OR 'pragmatic clinical trial' OR 'pragmatic trials' OR ((prospective OR retrospective) NEAR/5 (observation* OR study)) OR 'case study'/exp OR 'case series' OR 'large case series' OR (case NEAR/2 (stud* OR series OR large)) | Study design | 10,621,840     |
| 8                                                   | 'dolutegravir'/syn OR 'dolutegravir sodium' OR 'dolutegravir sodium monohydrate' OR 'gsk 1349572' OR 'gsk 1349572a' OR 'gsk 572' OR 'gsk1349572' OR 'gsk1349572a' OR 'gsk572' OR 's 1349572' OR 's 349572' OR 's gsk 1349572' OR 's gsk1349572' OR 's-349572' OR 's1349572' OR 's349572' OR 'tivicay' OR 'dtg':ab,ti OR 'juluca' OR 'triumeq' OR 'str':ab,ti                                                                                                                                                                                                                                                                                                                                                                                                                                                                                                                                                                                                                                                                                                             | Intervention | 21,642         |
| 9                                                   | #6 AND #7 AND #8                                                                                                                                                                                                                                                                                                                                                                                                                                                                                                                                                                                                                                                                                                                                                                                                                                                                                                                                                                                                                                                         | Combination  | 2267           |
| 10                                                  | #9 AND ([editorial]/lim OR [letter]/lim OR [note]/lim OR [review]/lim OR [short survey]/lim)                                                                                                                                                                                                                                                                                                                                                                                                                                                                                                                                                                                                                                                                                                                                                                                                                                                                                                                                                                             | Limits       | 241            |
| 11                                                  | #9 AND [animals]/lim NOT ([humans]/lim AND [animals]/lim)                                                                                                                                                                                                                                                                                                                                                                                                                                                                                                                                                                                                                                                                                                                                                                                                                                                                                                                                                                                                                |              | 15             |
| 12                                                  | #10 OR #11                                                                                                                                                                                                                                                                                                                                                                                                                                                                                                                                                                                                                                                                                                                                                                                                                                                                                                                                                                                                                                                               |              | 256            |
| 13                                                  | #9 NOT #12                                                                                                                                                                                                                                                                                                                                                                                                                                                                                                                                                                                                                                                                                                                                                                                                                                                                                                                                                                                                                                                               |              | 2011           |
| 14                                                  | #13 AND [2013-2020]/py                                                                                                                                                                                                                                                                                                                                                                                                                                                                                                                                                                                                                                                                                                                                                                                                                                                                                                                                                                                                                                                   | Final hits   | 1879           |

| <b>Cochrane databases search strings</b>                      |                                                                                                                                                                                                                                                                                                                                               |                          |         |
|---------------------------------------------------------------|-----------------------------------------------------------------------------------------------------------------------------------------------------------------------------------------------------------------------------------------------------------------------------------------------------------------------------------------------|--------------------------|---------|
| 1                                                             | MeSH descriptor: [HIV] explode all trees                                                                                                                                                                                                                                                                                                      | Disease                  | 3088    |
| 2                                                             | MeSH descriptor: [HIV Infections] explode all trees                                                                                                                                                                                                                                                                                           |                          | 12,626  |
| 3                                                             | hiv:ab,ti or "hiv-1":ab,ti or "hiv 1":ab,ti or "hiv-2":ab,ti or "hiv 2":ab,ti or hiv1:ab,ti or hiv2:ab,ti or "hiv-i":ab,ti or "hiv-ii":ab,ti or "hiv infection" or "hiv-infection" or "hiv infect*" or (hiv:ab,ti and infect*)                                                                                                                |                          | 25,343  |
| 4                                                             | MeSH descriptor: [Acquired Immunodeficiency Syndrome] explode all trees                                                                                                                                                                                                                                                                       |                          | 1959    |
| 5                                                             | aids:ab,ti or ("acquired immun*" and "deficiency virus") or (acquir* next/5 (immun* or immunodeficiency or immunodeficiency or virus or infection*))                                                                                                                                                                                          |                          | 13,029  |
| 6                                                             | #1 or #2 or #3 or #4 or #5                                                                                                                                                                                                                                                                                                                    |                          | 32,762  |
| 7                                                             | dolutegravir or "dolutegravir sodium" or "dolutegravir sodium monohydrate" or "gsk 1349572" or "gsk 1349572a" or "gsk 572" or "gsk1349572" or "gsk1349572a" or gsk572 or "s 1349572" or "s 349572" or "s gsk 1349572" or "s gsk1349572" or "s-349572" or s1349572 or s349572' or tivicay or dtg:ab,ti or juluca or triumeq or str:ab,ti       | Intervention             | 1070    |
| 8                                                             | #6 and #7 (Publication Year from 2013 to 2020)                                                                                                                                                                                                                                                                                                | Combination (final hits) | 596     |
| <b>PubMed platform search strings for MEDLINE® In-Process</b> |                                                                                                                                                                                                                                                                                                                                               |                          |         |
| 1                                                             | Search HIV                                                                                                                                                                                                                                                                                                                                    | Disease                  | 375,682 |
| 2                                                             | Search (hiv[Title/Abstract] OR "hiv-1"[Title/Abstract] OR "hiv 1"[Title/Abstract] OR "hiv-2"[Title/Abstract] OR "hiv 2"[Title/Abstract] OR hiv1[Title/Abstract] OR "hiv2"[Title/Abstract] OR "hiv-i"[Title/Abstract] OR "hiv-ii"[Title/Abstract] OR "hiv infection" OR "hiv-infection" OR (hiv infect*) OR (hiv[Title/Abstract] AND infect*)) |                          | 359,008 |
| 3                                                             | Search (("human immunodeficiency virus infection" OR "human immunodeficiency virus" OR "human immunodeficiency virus" OR ((human immun*) AND "deficiency virus")))                                                                                                                                                                            |                          | 97,728  |
| 4                                                             | Search "acquired immune deficiency syndrome"                                                                                                                                                                                                                                                                                                  |                          | 6090    |
| 5                                                             | Search (aids[Title/Abstract] OR ((acquired immun*) AND (deficiency AND (virus OR infect*))))                                                                                                                                                                                                                                                  |                          | 157,100 |
| 6                                                             | Search (#1 OR #2 OR #3 OR #4 OR #5)                                                                                                                                                                                                                                                                                                           |                          | 457,261 |
| 7                                                             | Search (Dolutegravir OR "dolutegravir sodium" OR "gsk 1349572" OR "gsk1349572" OR "tivicay" OR "triumeq")                                                                                                                                                                                                                                     | Intervention             | 1300    |
| 8                                                             | Search (#6 AND #7 (inprocess[sb] OR pubstatusaheadofprint))                                                                                                                                                                                                                                                                                   | Combination              | 317     |
| 9                                                             | Search (#8 (Publication Year from 2013 to 2017))                                                                                                                                                                                                                                                                                              | Final hits               | 182     |

**Table S2.** Quality Measures of the 4 Observational Studies That Included Effectiveness Data

| Source                             | Study design  | Comparator group(s)? | Exclusion criteria                                                            | Sample size justification? | Assessment of primary effectiveness outcome               | Data on adherence to medicine? | Censoring for loss to follow-up? | PWH lost to follow-up for any reason, n (%) | Description of reasons for treatment discontinuation? | Description of how missing data were handled? |
|------------------------------------|---------------|----------------------|-------------------------------------------------------------------------------|----------------------------|-----------------------------------------------------------|--------------------------------|----------------------------------|---------------------------------------------|-------------------------------------------------------|-----------------------------------------------|
| Maggiolo 2018 [32]                 | Prospective   | No                   | VL >50 c/mL; HBsAg positive; documented resistance to study drugs             | No                         | No description                                            | No                             | NR                               | 17 (8)                                      | Yes                                                   | No                                            |
| Hidalgo-Tenorio 2019 (DOLAMA) [52] | Retrospective | No                   | VL >50 c/mL; HBV treated with tenofovir; pregnancy; resistance to study drugs | Yes                        | From clinical records                                     | No                             | No                               | 31 (18)                                     | Yes                                                   | No                                            |
| Baldin et al 2019 [30]             | Retrospective | No                   | VL >50 c/mL; HBsAg positive                                                   | No                         | No description                                            | No                             | No                               | 110 (20)                                    | Yes                                                   | No                                            |
| Galizzi 2020 (CSLHIV) [48]         | Retrospective | Yes                  | VL >50 c/mL                                                                   | No                         | No description of whether virologic analyses were blinded | No                             | Yes                              | NR for DTG + 3TC population                 | NR for DTG + 3TC population                           | No                                            |

c/mL, copies/mL; DTG, dolutegravir; HBsAg, hepatitis B surface antigen; HBV, hepatitis B virus; NR, not reported; PWH, people with HIV; 3TC, lamivudine; VF, virologic failure; VL, viral load. Duplicate studies have been removed.

**Table S3.** Characteristics of Studies With ART-Naive PWH

| Source                  | Study type               | ART-naive PWH receiving DTG + 3TC, n | Baseline VL                                | PWH with available genotype at baseline (n) | Baseline resistance substitutions in PWH with available genotype at baseline, n (%)                                  | Effectiveness outcome                                           |
|-------------------------|--------------------------|--------------------------------------|--------------------------------------------|---------------------------------------------|----------------------------------------------------------------------------------------------------------------------|-----------------------------------------------------------------|
| Ciccullo 2020 [31]      | Multicenter, prospective | 10                                   | 4.84 log <sub>10</sub> c/mL (median)       | 10                                          | 1 (10%) individual had resistance to NNRTIs or first-generation INSTI elvitegravir and raltegravir (Y188C and D232N) | 7 PWH reached 24 wk of follow-up and all had VL <50 c/mL        |
| Cabello Úbeda 2019 [40] | Retrospective            | 30                                   | NR                                         | 0                                           | Resistance mutations in 4 PWH (E138A, K103N, V106I, V82C)                                                            | At 12 wk, 92% of PWH had VL <50 c/mL                            |
| Stephenson 2020 [43]    | Retrospective            | 4                                    | 2 had VL >10,000 c/mL, 2 had VL <1000 c/mL | NR                                          | NR                                                                                                                   | By 8 wk, 100% had VL <30 c/mL                                   |
| Postel 2020 [44]        | Multicenter, Prospective | 25                                   | 37,100 c/mL (median)                       | NR                                          | NR                                                                                                                   | 90% achieved VL <50 c/mL at 6 mo, no discontinuations due to VF |

ART, antiretroviral therapy; c/mL, copies/mL; DTG, dolutegravir; INSTI, integrase strand transfer inhibitor; NNRTI, non-nucleoside reverse transcriptase inhibitor; NR, not reported; PWH, people with HIV; 3TC, lamivudine; VF, virologic failure; VL, viral load.

**Table S4.** Reported Bone Mineral Density Outcomes in PWH Receiving DTG + 3TC

| <b>Study<sup>a</sup></b> | <b>PWH on DTG + 3TC, N</b> | <b>Time point (wk)</b> | <b>% of DTG + 3TC PWH on TDF before switch</b> | <b>PWH with osteoporosis at BL, n (%)</b> | <b>PWH with osteopenia at BL, n (%)</b> | <b>Bone health outcomes vs BL</b>                                                                                                                                                                       |
|--------------------------|----------------------------|------------------------|------------------------------------------------|-------------------------------------------|-----------------------------------------|---------------------------------------------------------------------------------------------------------------------------------------------------------------------------------------------------------|
| Ciccullo 2018 [71]       | 20                         | 48                     | NR <sup>b</sup>                                | 6 (30)                                    | 9 (45)                                  | Significant mean increase in lumbar spine BMD of 4.3% (+0.03 g/cm <sup>2</sup> ; 95% CI, 0.01-0.05; <i>P</i> =0.001)<br>No significant difference in femur BMD                                          |
| Piscaglia 2018 [72]      | 21                         | 96 (± 4 wk)            | 48                                             | NR                                        | NR                                      | Significant improvement in spine BMD (+3.17%; <i>P</i> <0.001) in 21 PWH receiving DTG + 3TC and having a DEXA scan within 6 mo of switch, and 96 wk after that<br>No significant difference in hip BMD |
| Calza 2020 [73]          | 29                         | 48                     | NR                                             | 4 (14)                                    | 11 (38)                                 | No significant difference in lumbar spine BMD or femur neck BMD<br>No change in numbers of PWH with osteopenia or osteoporosis                                                                          |

BL, baseline; BMD, bone mineral density; DEXA, dual-energy x-ray absorptiometry; DTG, dolutegravir; PWH, people with HIV; 3TC, lamivudine; TDF, tenofovir disoproxil fumarate.

<sup>a</sup>Ciccullo 2018 and Piscaglia 2018 contain data from different studies from the ODOACRE cohort. <sup>b</sup>19 (95%) PWH had previously taken TDF.

**Figure S1.** Proportion of PWH in switch cohorts treated with DTG + 3TC in studies reporting on resistance observed at virologic failure. PWH with resistance substitutions have been arbitrarily designated as 1 and 2. Data only included for studies reporting treatment-emergent resistance at any time point. Duplicate studies have been removed. BL, baseline; DTG, dolutegravir; INSTI, integrase strand transfer inhibitor; NRTI, nucleoside reverse transcriptase inhibitor; PWH, people with HIV; 3TC, lamivudine; VF, virologic failure. <sup>a</sup>Resistance testing performed only on those with VF and available samples. <sup>b</sup>Substitution formatted in bold to highlight the only INSTI or NRTI substitution reported at failure that was not reported at BL.

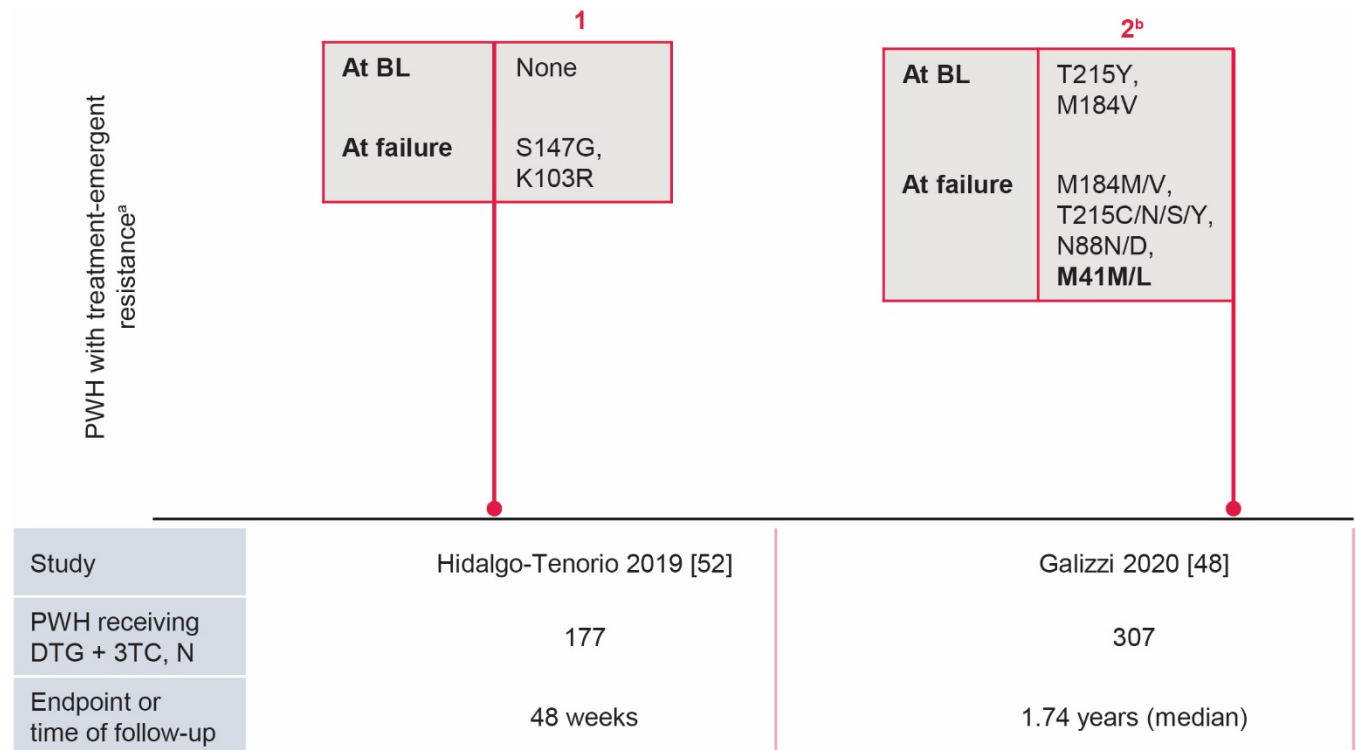

**Figure S2.** Proportion of PWH in switch studies treated with DTG + 3TC with discontinuation due to toxicity or adverse events. Data included for studies with N ≥100 and reporting discontinuations due to AEs at any time point. Duplicate studies have been removed. AE, adverse event; CNS, central nervous system; DTG, dolutegravir; NR, not reported; PWH, people with HIV; 3TC, lamivudine. <sup>a</sup>Percentage calculated based on overall N on DTG + 3TC.

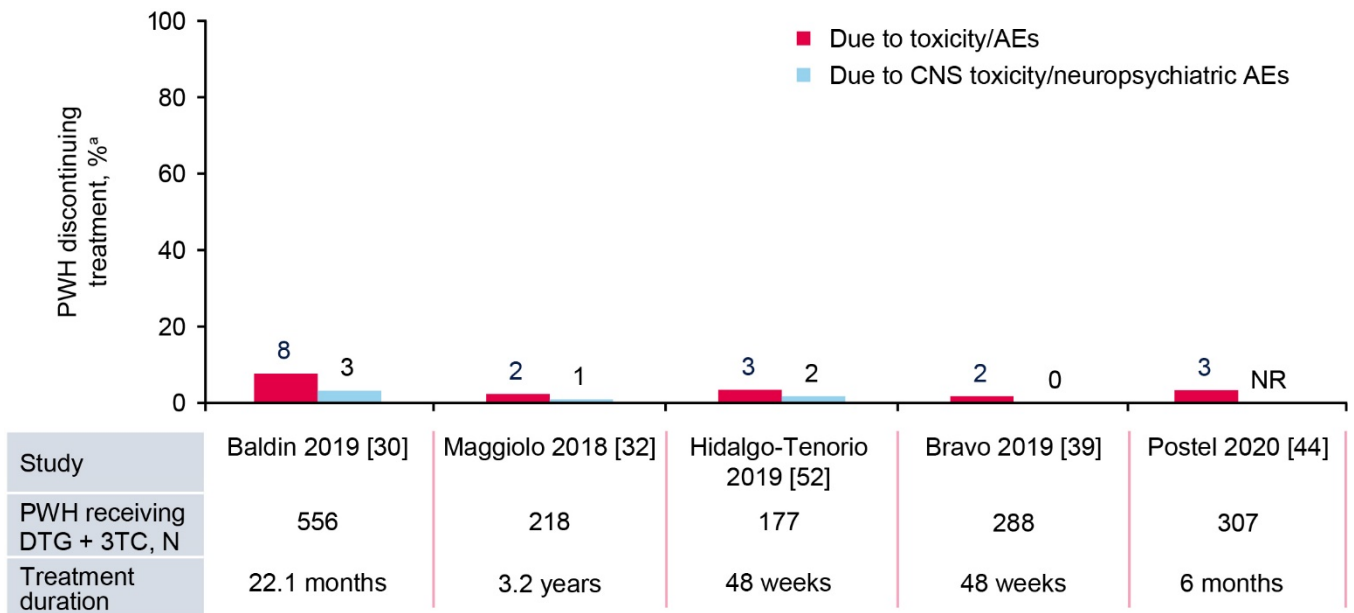

Supplement: 40121_2021_522_MOESM1_ESM.pdf [file 40121_2021_522_MOESM1_ESM.pdf]
